# Supplementary material for: Low-Temperature Storage Improves the Over-Time Stability of Implantable Glucose and Lactate Biosensors
Source: MDPI journal article supplement (doi:10.3390/s19020422), 2019-01-21
Supplement: s1 [file s1]

# Low-Temperature Storage Improves the Over-Time Stability of Implantable Glucose and Lactate Biosensors

Giulia Puggioni <sup>†</sup>, Giammaria Calia <sup>†</sup>, Paola Arrigo, Andrea Bacciu, Gianfranco Bazzu, Rossana Migheli, Silvia Fancello, Pier Andrea Serra <sup>\*</sup> and Gaia Rocchitta

<sup>1</sup> Medical, Surgical and Experimental Sciences, University of Sassari, Viale San Pietro 43/b, 07100 Sassari, Italy; giuliamariagrazia@gmail.com (G.P.); gmcalia@uniss.it (G.C.); pa1989@live.it (P.A.); andreabacciu90@gmail.com (A.B.); gbazzu@uniss.it (G.B.); rmigheli@uniss.it (R.M.); sfancello@uniss.it (S.F.); grocchitta@uniss.it (G.R.)

<sup>\*</sup> Correspondence: paserra@uniss.it.

<sup>†</sup> The authors share first name.

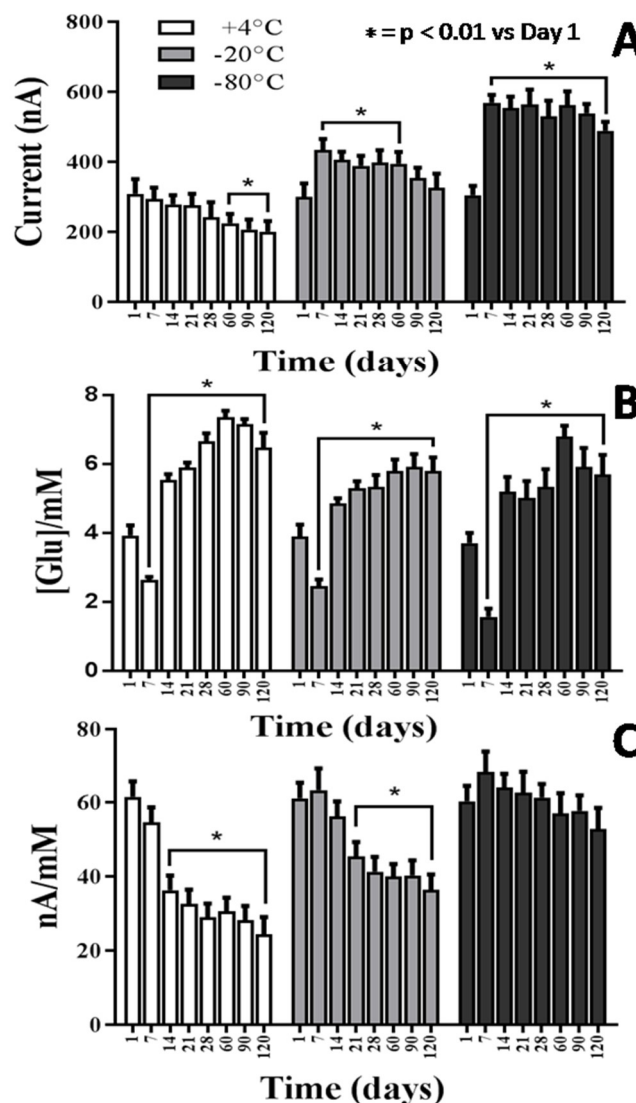

**Figure S1.** Bar chart describing the variations of V<sub>MAX</sub> (Panel A, white bars), K<sub>M</sub> (Panel B, light gray bars) and LRS (Panel C, dark gray bars) of GB1 design Pt/PPD/[PEI(0.5%)-GOx]<sub>5</sub>/PU(5%) in the defined range of 120 days. Values are expressed as mean ± SEM. \*p<0.01 vs Day 1.

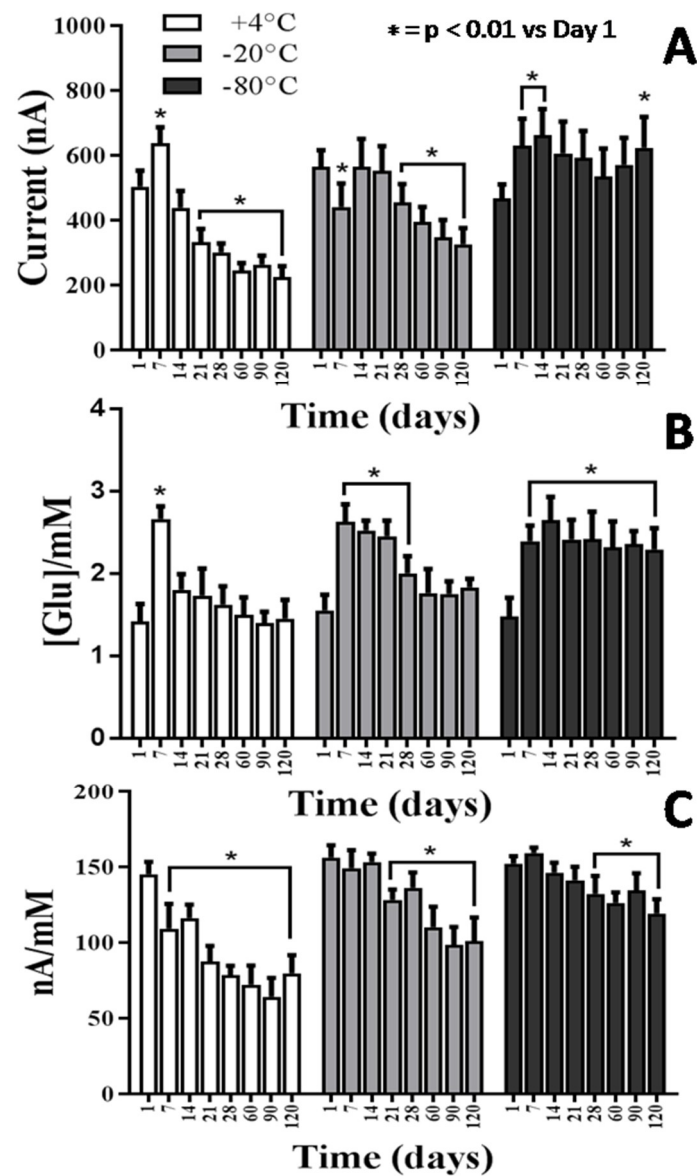

**Figure S2.** Bar chart describing the variations of  $V_{\text{MAX}}$  (Panel A, white bars),  $K_{\text{M}}$  (Panel B, light gray bars) and LRS (Panel C, dark gray bars) of GB2 design Pt/PPD/[PEI(0.5%)-GOx]<sub>5</sub>/GTA(1%)-BSA (2%) in the defined range of 120 days. Values are expressed as mean  $\pm$  SEM. \* $p < 0.01$  vs Day 1.

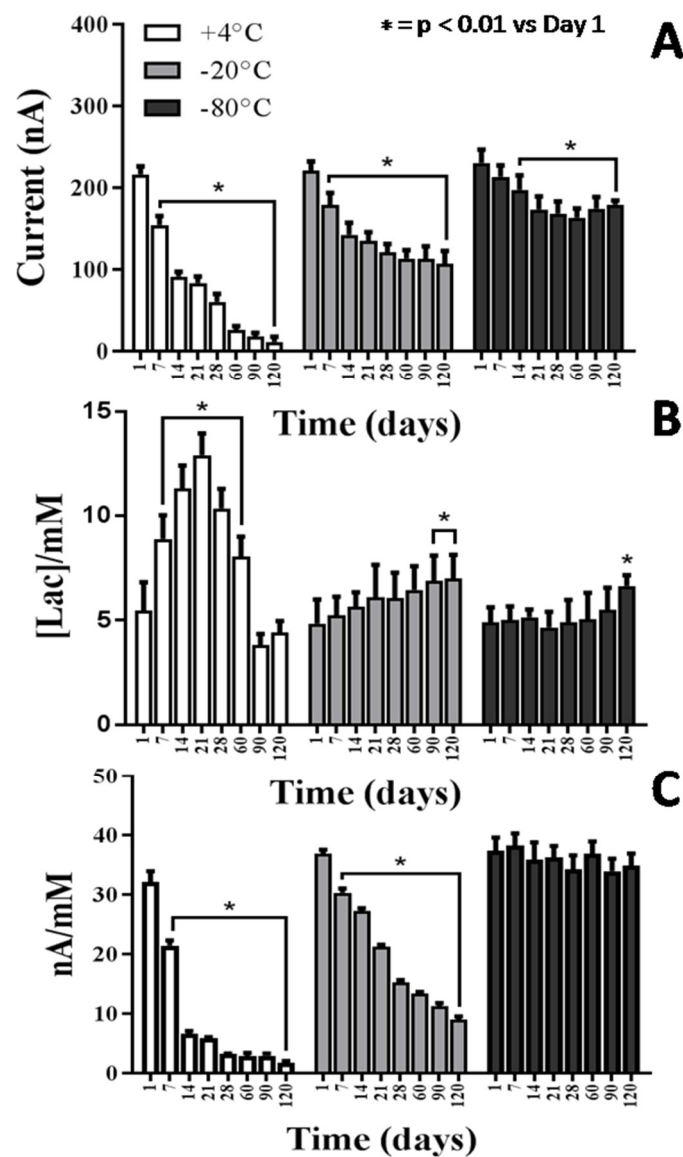

**Figure S3.** Bar chart describing the variations of  $V_{\text{MAX}}$  (Panel A, white bars),  $K_M$  (Panel B, light gray bars) and LRS (Panel C, dark gray bars) of LB1 design Pt<sub>2</sub>/PPD/[PEI(0.5%)-LOX]<sub>5</sub>/GTA(1%)-BSA (2%) in the defined range of 120 days. Values are expressed as mean  $\pm$  SEM. \* $p < 0.01$  vs Day 1.

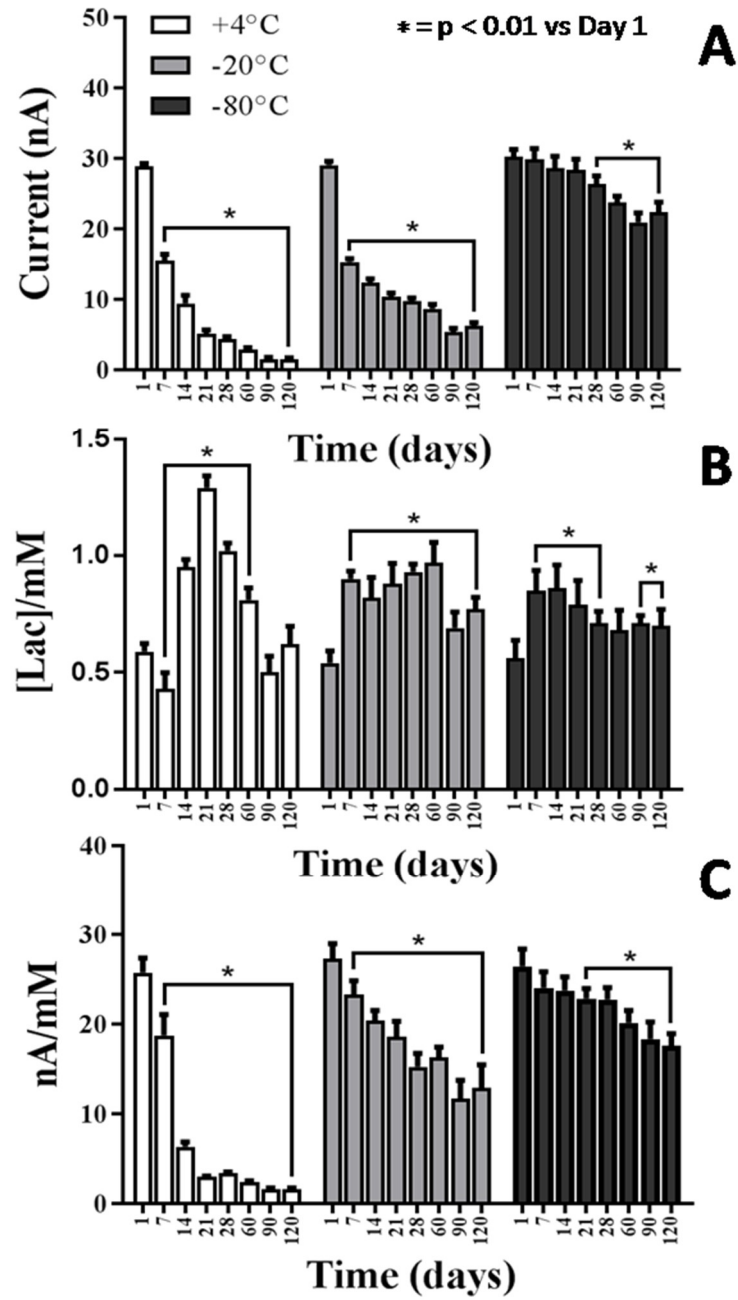

**Figure S4.** Bar chart describing the variations of  $V_{\text{MAX}}$  (Panel A, white bars),  $K_{\text{M}}$  (Panel B, light gray bars) and LRS (Panel C, dark gray bars) of LB2 design Pt<sub>6</sub>/PPD/[PEI(0.5%)-LOx]<sub>5</sub>/GTA(1%)-BSA (2%) in the defined range of 120 days. Values are expressed as mean  $\pm$  SEM. \* $p < 0.01$  vs Day 1.
